# Supplementary material for: Metal–organic coordination architectures of 9,10-bis(N-benzimidazolyl)anthracene: syntheses, structures and emission properties
Source: Royal Society of Chemistry journal article supplement (doi:10.1039/b701551h), 2007-01-01
Supplement: b701551h.pdf [file b701551h.pdf]

## Supporting Information

### Metal-Organic Coordination Architectures of 9,10-Bis(N-benzimidazolyl)

#### anthracene: Syntheses, Structures and Emission Properties

Lei Li, Tong-Liang Hu, Jian-Rong Li, Duo-Zhi Wang, Yong-Fei Zeng, and Xian-He Bu\*

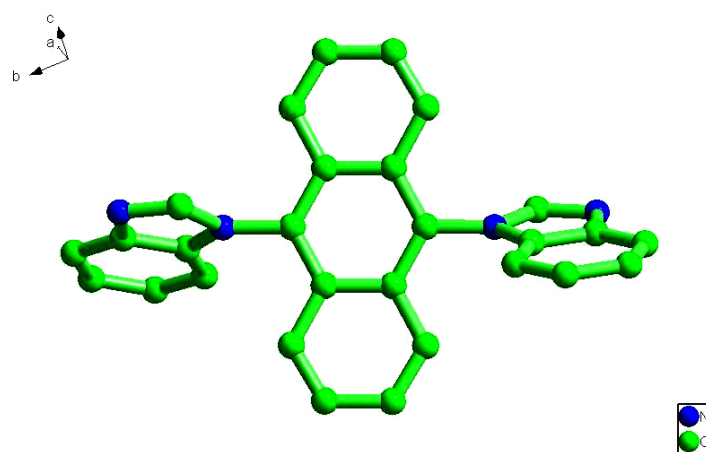

**Fig. S1** The crystal structure of Ligand L
